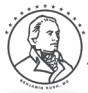

# APA Annual Meeting ON DEMAND

Save over \$1,000\* when you order  
APA Annual Meeting on Demand!

Features of APA Annual Meeting on Demand include:

- Online access within 24 hours of the live presentation
- Over 300+ hours of content
- **New! Enhanced Search:** Quickly find any word on any slide
- Streaming content on iPad\* and most mobile devices
- Compact USB drive for offline access\*\*
- Downloadable MP3 files
- Additional CME credit available

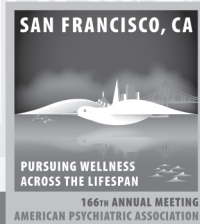

Buy Today and Save \$600

Meeting attendees are eligible for the best price.

Sign up for the Gold Registration Package at:  
[annualmeeting.psychiatry.org/registration](http://annualmeeting.psychiatry.org/registration)

Can't attend? Order APA on Demand at

[www.CMEonCall.com/apa13](http://www.CMEonCall.com/apa13)

Pre-meeting discounts end May 22 so order today!

\*Savings vary with registration category.

\*\*Hard Drive does not contain all features available in the online version.

## 9th Congress of the International Neuropsychiatric Association

Treating Neuropsychiatric Illness: A Multidisciplinary Approach

September 25-27, 2013

Congress Plaza Hotel

Chicago, IL, USA

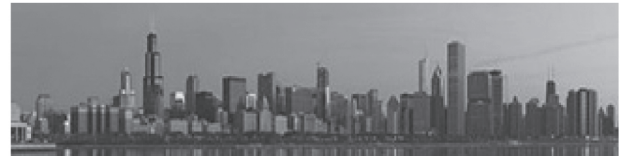

### Topics Include:

- Epilepsy
- Vascular Dementia
- Deep Brain Stimulation
- Traumatic Brain Injury
- Management of Stroke
- Neuroimaging

### Special Lectures Include:

- “The Better Angels of Our Nature”  
**Dr. Steven Pinker**
- “The Incredible Renaissance of Brain Stimulation Methods: Current Status and Future Implications for Neuropsychiatry”  
**Dr. Mark George**
- “Neuroscience, Memory and the Law”  
**Dr. Michael Kopelman**

Registration and Abstract Submission Now Open

[www.neuropsychiatrychicago2013.com](http://www.neuropsychiatrychicago2013.com)

Hosted by the International Neuropsychiatric Association and the

Neuroscience Institute of the Advocate Christ Medical Center.

Sponsorship from the University of Illinois at

Chicago, Synergy Behavioral Health, and the Institute for Psychoanalysis

## A Daily “Pearl” is Just a Click Away!

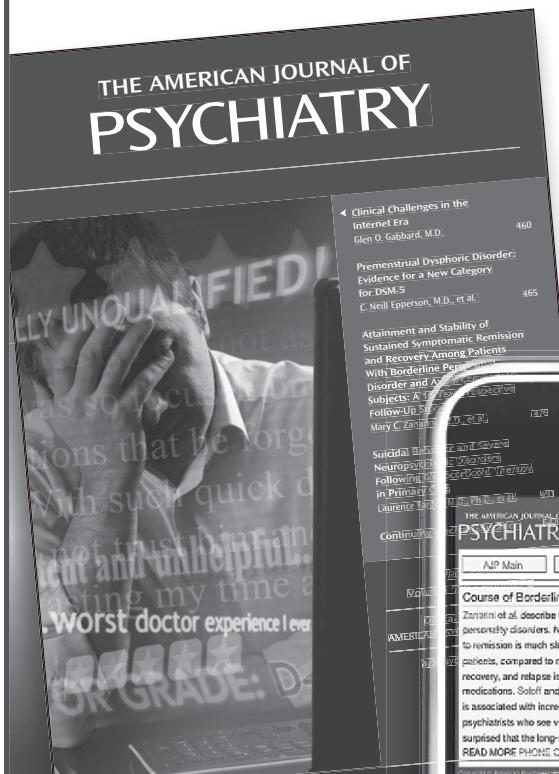

The Editors of *The American Journal of Psychiatry* have developed a special mobile-optimized website that displays a single bit of *Clinical Guidance* every day gleaned from research published on the pages of the *Journal*. Users can click through to the main article or explore an archive of all previously prepared *Clinical Guidance* pieces arranged by topic.

Visit **AJPClinical.com**

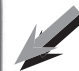

THE AMERICAN JOURNAL OF  
PSYCHIATRY Clinical Guidance

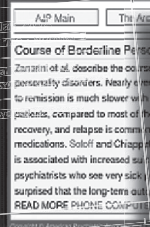

THE AMERICAN JOURNAL OF  
PSYCHIATRY Clinical Guidance

AJP Main The Archives

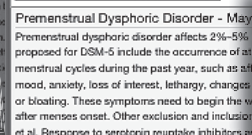

THE AMERICAN JOURNAL OF  
PSYCHIATRY Clinical Guidance

AJP Main The Archives

Antipsychotic Treatment of Delirium in Severely Ill  
Children - Oct. 1, 2010

Children under 5 years of age in the pediatric intensive care unit may develop delirium as a consequence of the presence and treatment of severe medical illnesses. Silver et

**JUST  
PUBLISHED!**

# Management of Adults With Traumatic Brain Injury

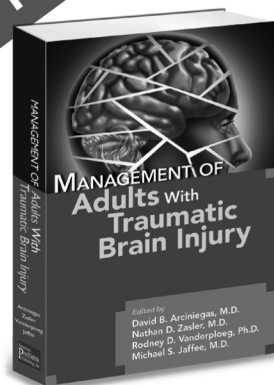

Edited by  
David B. Arciniegas, M.D.,  
Nathan D. Zasler, M.D.,  
Rodney D. Vanderploeg, Ph.D.,  
and Michael S. Jaffee, M.D.

*Management of Adults with Traumatic Brain Injury* is an up-to-the-minute, comprehensive, and useful text designed to support busy physicians, nurses, and mental health professionals

working with persons with traumatic brain injury (TBI) and their families. Understanding and improving outcomes after TBI requires consideration of the effects of biomechanical forces on the brain and the interactions between the injury, the person experiencing it, and the psychosocial context in which TBI and its consequences occur.

A multidisciplinary approach to the management of persons with TBI therefore is essential. Accordingly, this book presents and synthesizes the work of internationally recognized brain injury clinicians, scientists, and educators who were selected by a team of editors with backgrounds in psychiatry, neurology, psychology, and psychiatry. This broad range of perspectives enhances understanding and provides nuanced yet practical information on the neuropsychiatric management of persons with TBI.

Evidence-informed, concise, and clinically rich, this book will be of enormous value to health care providers grappling with the neurological and mental health consequences of this widespread public health problem.

The volume offers many useful features to its readers, including:

- Chapters written by an internationally known group of editors and contributors offering cutting-edge, multidisciplinary perspectives in brain injury medicine.
- Guidance on the identification and management of early and late postinjury neuropsychiatric disturbances as well as their psychological and psychosocial consequences.
- Identification of special issues relevant to the evaluation and treatment of TBI and postconcussive symptoms among military service members and Veterans.
- Discussion of the ethics and methods of forensic assessment of persons with TBI.
- Key Clinical Points that highlight concepts, assessment issues, and clinical management strategies in each chapter.
- A wealth of tables and figures to enhance the accessibility and clinical utility of the book, as well as appendices of additional readings and relevant websites for persons and families affected by TBI and the clinicians providing their care.

Impressive breadth and depth of coverage, logical structure, clinically rich detail, and concise presentation make *Management of Adults with Traumatic Brain Injury* a must-read for every physician, nurse, and mental health practitioner working to improve the lives of persons with TBI.

2013 • 587 pages • ISBN 978-1-58562-404-1 • Paperback  
\$79.00 • Item #62404

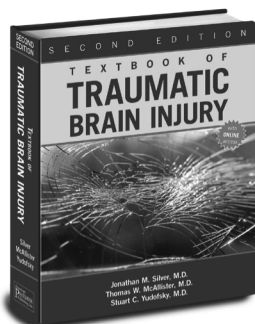

## Textbook of Traumatic Brain Injury, Second Edition

Edited by Jonathan M. Silver, M.D.,  
Thomas W. McAllister, M.D.,  
and Stuart C. Yudofsky, M.D.

This edition of *Textbook of Traumatic Brain Injury* has been thoroughly revised and updated from the 2005

first edition to reflect the exponential expansion of research and clinical data amassed in the intervening years. Each chapter was written and reviewed by the foremost authorities in neuropsychiatry, neurology, rehabilitation medicine, and the other specialties who assess, diagnose, and treat these patients.

The book has been closely edited to achieve a level of writing that is consistent and engaging and that addresses the needs of all medical professionals.

2011 • 686 pages • ISBN 978-1-58562-357-0 • Hardcover  
\$169.00 • Item #62357

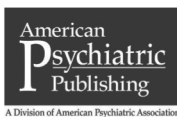

The *First* and *Last* Word in Psychiatry

Order Online: [www.appi.org](http://www.appi.org) • Phone: 1-800-368-5777

Fax: 703-907-1091 • Email: [appi@psych.org](mailto:appi@psych.org)

Find us on  Facebook and  Twitter.

Priority Code AH1315

20% Discount  
For American Psychiatric  
Association Members!

25% Discount  
For APA Members-in-Training

# American Neuropsychiatric Association

The American Neuropsychiatric Association (ANPA), established in 1988, is an organization of professionals in neuropsychiatry, behavioral neurology, neuropsychology and the clinical neurosciences. Our mission is to improve the lives of people with disorders at the interface of psychiatry and neurology.

One strength of our organization is our diverse membership, which is comprised of professionals in all areas of neuroscience who share clinical and/or academic interests in neuropsychiatry. The interdisciplinary makeup of the membership encourages collaboration among educators, clinicians, researchers, students and trainees during research presentations, symposia, workshops, and continuing education courses. *The Journal of Neuropsychiatry and Clinical Neurosciences (JNCN)* is the official publication of the organization, and a subscription is a benefit of membership.

ANPA holds an annual scientific meeting and provides up to 30 CME/CE credits. Members are encouraged to submit their work for presentation at our annual meetings. Travel awards are available for promising young investigators. Annual meeting abstracts and proceedings are published in *JNCN*.

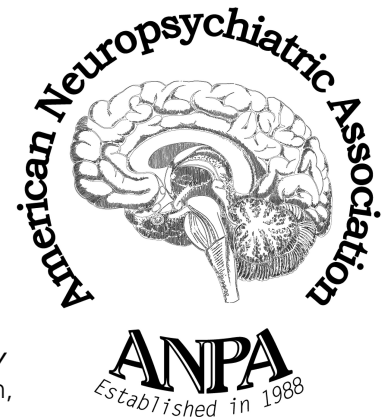

## Contact Information

### Benefits of Membership

- Subscription to *The Journal of Neuropsychiatry and Clinical Neurosciences (JNCN)*
- Discounts on subscriptions to PsychiatryOnline.com including DSM Premium and DSM Premium Plus
- Opportunities for presenting at the annual meeting with accepted abstracts published in the *JNCN*
- Significantly reduced registration fees at the annual meeting
- Newsletters, news updates, information on job and training opportunities, research and meeting information on the ANPA web site: [www.anpaonline.org](http://www.anpaonline.org)
- Discounted membership and meeting registration fees for trainees
- Collaboration in clinical, educational and research activities with opportunities to interact with leaders in the field

Website:  
[www.anpaonline.org](http://www.anpaonline.org)

Email:  
[anpa@osu.edu](mailto:anpa@osu.edu)

Phone:  
614-447-2077

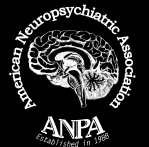

### Join ANPA Now!

Don't miss ANPA's 25<sup>th</sup>  
Annual Meeting

Sheraton Seattle Hotel  
Seattle, Washington

February 15-19, 2014

# Seattle Washington USA

Join online at: [www.anpaonline.org](http://www.anpaonline.org)

25<sup>th</sup> annual meeting

# American Neuropsychiatric Association

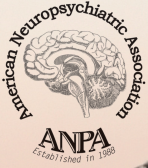

Sheraton Seattle Hotel  
February 15-19, 2014

## Seattle Washington USA

For more information contact the American Neuropsychiatric Association office:

700 Ackerman Road, Suite 625 • Columbus, Ohio USA 43202 • Phone: 614-447-2077 • E-mail: [anpa@osu.edu](mailto:anpa@osu.edu)

## Meeting Announcement & Call for Abstracts

You are invited to submit abstracts reporting  
new research or challenging clinical cases  
for poster or platform presentations.

Abstracts presented at the meeting will be published on-line in the spring 2014  
issue of *The Journal of Neuropsychiatry and Clinical Neurosciences*.

Prior to submitting abstracts, please refer to our website for information about  
ANPA's award programs, platform sessions, and poster session.

**Deadline for receipt of abstracts is October 1, 2013.**

Meeting information can be found on the ANPA web site: [www.anpaonline.org](http://www.anpaonline.org) as it becomes available.

Complete submission instructions will be available June 1, 2013 at:

**[www.anpaonline.org](http://www.anpaonline.org)**
