# THE JOURNAL OF NEUROPSYCHIATRY and Clinical Neurosciences

The Official Journal of the American Neuropsychiatric Association

## In this issue:

- Oxytocin and Behavior: Evidence for Effects in the Brain
- Concepts and Strategies for Clinical Management of Blast-Induced Traumatic Brain Injury and Posttraumatic Stress Disorder
- The Forthcoming DSM-5, Critical Care Medicine, and Pediatric Neuropsychiatry: Which New Concepts Do We Need?
- Outcomes of Sports-Related Concussion Among College Athletes
- Use of Low-Dose Gabapentin for Aggressive Behavior in Vascular and Mixed Vascular/Alzheimer Dementia

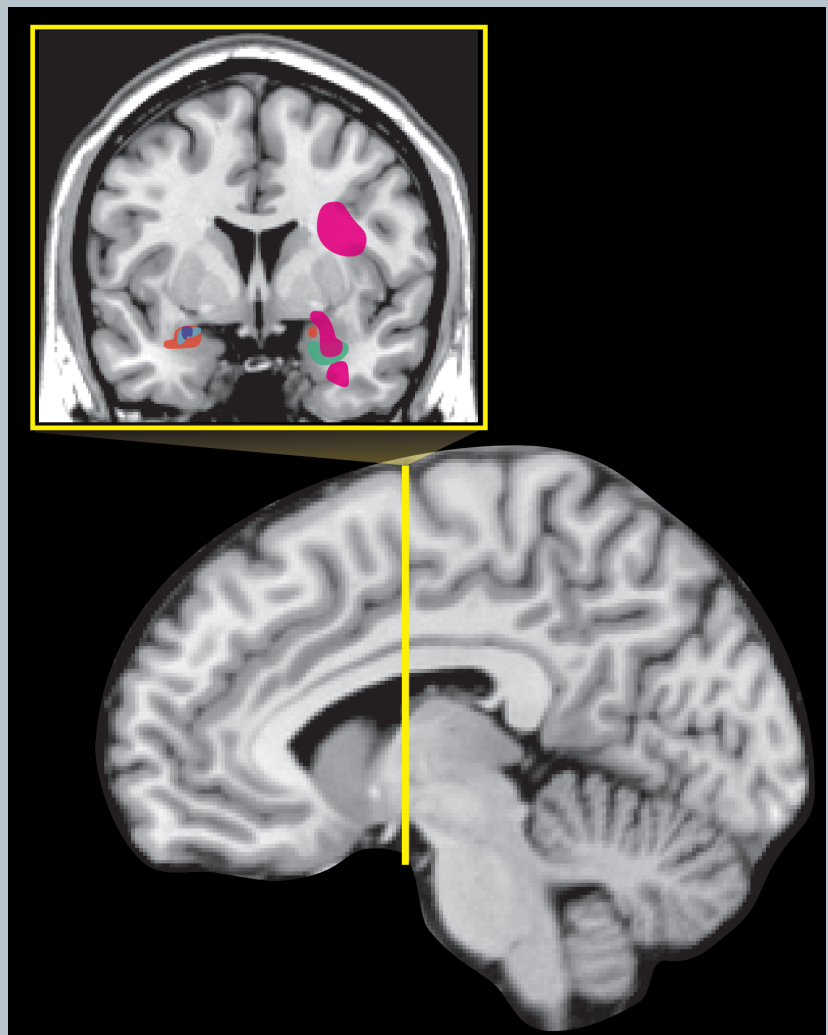

Source: https://psychiatryonline.org/doi/suppl/10.1176/jnp.2013.25.issue-2/suppl_file/cover.pdf
